# Supplementary material for: Water-based 2-dimensional anatase TiO2 inks for printed diodes and transistors
Source: Royal Society of Chemistry journal article supplement (doi:10.1039/d2nr05786g), 2023-01-01
Supplement: d2nr05786g1.pdf [file d2nr05786g1.pdf]

## Supporting Information

### ***Water-based 2-Dimensional Anatase TiO<sub>2</sub> Inks for Printed Diodes and Transistors***

Omar Kassem<sup>a</sup>, Lorenzo Pimpolari<sup>b</sup>, Chaochao Dun<sup>c</sup>, Dmitry K. Polyushkin<sup>d</sup>, Marco Zarattini<sup>a</sup>, Elisabetta Dimaggio<sup>b</sup>, Liming Chen<sup>a</sup>, Giovanni Basso<sup>b</sup>, Federico Parenti<sup>b</sup>, Jeffrey J. Urban<sup>c</sup>, Thomas Mueller<sup>d</sup>, Gianluca Fiori<sup>b</sup>, Cinzia Casiraghi<sup>a\*</sup>

---

<sup>a</sup> Department of Chemistry, University of Manchester, Oxford Road, Manchester, UK M13 9PL

<sup>b</sup> Dipartimento di Ingegneria dell'Informazione, Università di Pisa, Pisa 56122, Italy

<sup>c</sup> The Molecular Foundry, Lawrence Berkeley National Laboratory Berkeley, Berkeley, CA, 94720, USA

<sup>d,d</sup> Institute of Photonics, Vienna University of Technology, Vienna, 1040, Austria

### **Content**

S1. Ink characterization

S2. Capacitor characterization

S3. Comparison with other printable dielectrics

## S1. Ink characterization

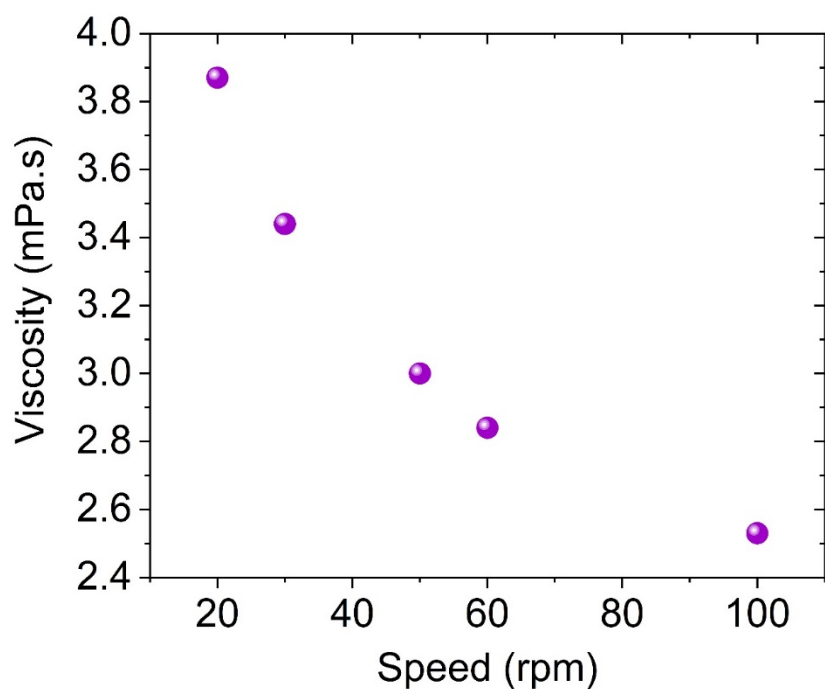

**Figure S1.** The dynamic viscosity of the TiO<sub>2</sub> ink versus the rotational speed of the viscometer probe at ambient temperature

**Table S1.** Optimized inkjet printing parameters of TiO<sub>2</sub>-NS ink

| Parameters                                  | Values                                          |
|---------------------------------------------|-------------------------------------------------|
| Firing voltage [V]                          | 17 ± 2V                                         |
| Jetting frequency [kHz]                     | 5                                               |
| Cartridge temperature [°C]                  | Ambient (≈ 23)                                  |
| Drop spacing [μm]                           | 30 (Glass - Paper)<br>35 (Si/SiO <sub>2</sub> ) |
| Meniscus pressure [inches H <sub>2</sub> O] | 4                                               |
| Platen temperature [°C]                     | 45                                              |

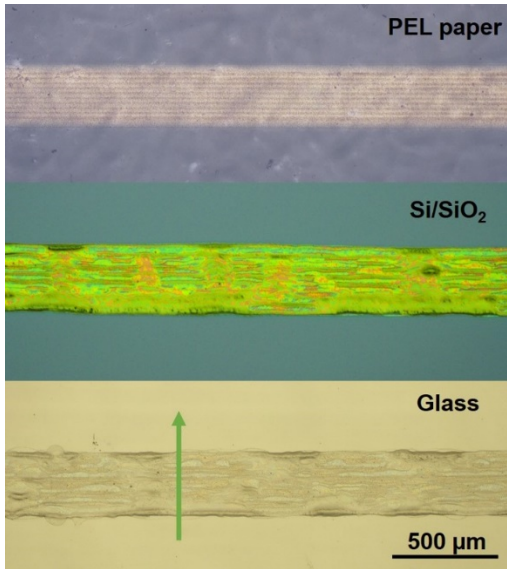

**Figure S2.** Optical micrographs showing inkjet-printed TiO<sub>2</sub> lines on paper, silicon and glass substrates. The green arrow indicates the profilometry scan direction.

## S2. Capacitor characterization

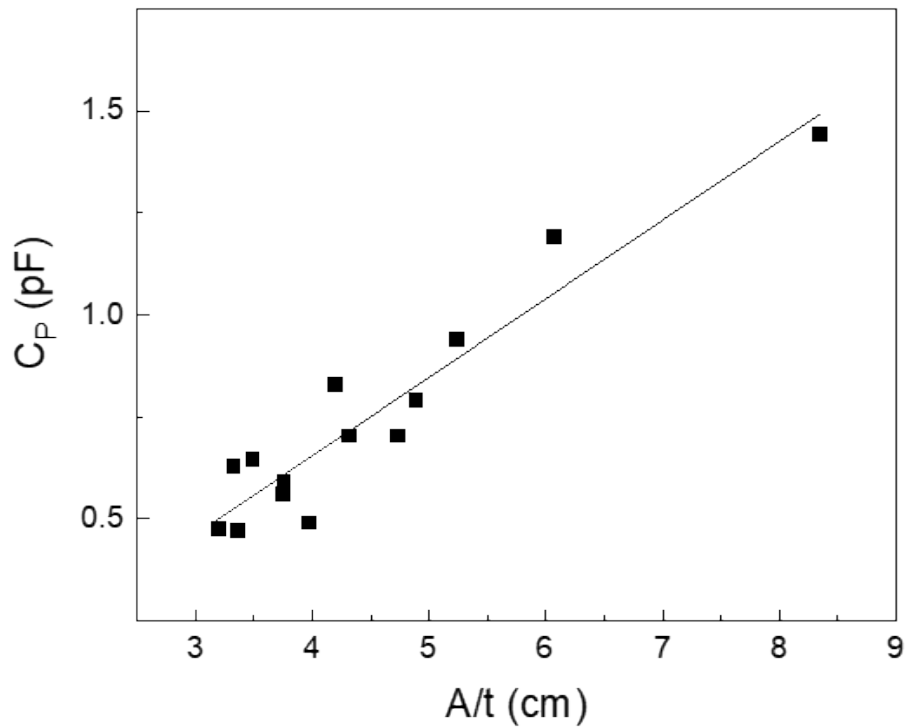

**Figure S3.** Capacitance values measured at 1 KHz plotted as a function of the area to thickness (A/t) ratio for inkjet-printed Graphene/TiO<sub>2</sub>-NS/Graphene capacitors. The line represents a linear fit to the experimental data.

### S3. Comparison with other printable dielectrics

**Table S2.** TiO<sub>2</sub>-NS ink dielectric properties as compared to other printable dielectrics reported in literature.

| Material                                                                               | Dielectric constant | Areal Capacitance                 | Thickness (nm) | Breakdown Voltage                | Leakage Current                         |
|----------------------------------------------------------------------------------------|---------------------|-----------------------------------|----------------|----------------------------------|-----------------------------------------|
| Gr TiO <sub>2</sub> Ns Gr<br>[this work]                                               | ~2<br>At 1 kHz      | 3 nF cm <sup>-2</sup>             | ~520           | 8.8 ± 1.7<br>MV cm <sup>-1</sup> | < 5x 10 <sup>-6</sup> A cm <sup>2</sup> |
| TiO <sub>2</sub> NPs<br>[ACS Nano 2010, 4,<br>1893]                                    | 58<br>At 1 kHz      | 190 nF cm <sup>-2</sup>           | 1000           | NA                               | NA                                      |
| Gr h-BN Gr<br>[ACS Nano 2019, 13, 54]                                                  | ~6<br>At 1kHz       | 2 nF cm <sup>-2</sup>             | 1000-3000      | 1.9 MV cm <sup>-1</sup>          | < 5x 10 <sup>-6</sup> A cm <sup>2</sup> |
| Ag h-BN Ag<br>[Nat. Comm. 2017, 8, 1]                                                  | ~11<br>At 2 kHz     | 8.7 nF cm <sup>-2</sup>           | 1200           | NA                               | NA                                      |
| CrAu HfO <sub>2</sub>  CrAu<br>[NPJ 2D Mater. Appl.<br>2022, 6,1-2]                    | ~4.8<br>At 2 kHz    | 425.6 nF cm <sup>-2</sup>         | 10             | 4.2 MV cm <sup>-1</sup>          | NA                                      |
| Gr BiOCl Gr<br>[ACS Appl. Electron.<br>Mater. 2020, 2, 10,<br>3233]                    | 41 ± 3              | 16.6 ± 1.4 nF<br>cm <sup>-2</sup> | 1600           | 0.67 MV cm <sup>-1</sup>         | NA                                      |
| Au PVP/pMSSQ Au<br>[Adv.<br>Electron.Mater.2017, 3,<br>1700057]                        | 3.85                | 0.67 nF cm <sup>-2</sup>          | 4800           | NA                               | NA                                      |
| Ag BaTiO <sub>3</sub> /poly(methyl<br>methacrylate) Ag<br>[ACS Nano 2014, 8,<br>12769] | 35<br>At 1 kHz      | 6.195 nF cm <sup>-2</sup>         | 5000           | NA                               | 5 x 10 <sup>-7</sup> A cm <sup>2</sup>  |
| Au triacetate<br>Cellulose Au<br>[Org. Elec. 2017, 41, 186]                            | 4.57<br>At 1 kHz    | 8.1 nF cm <sup>-2</sup>           | 325            | 1.54 MV cm <sup>-1</sup>         | 10 <sup>-7</sup> A cm <sup>2</sup>      |
